# Supplementary material
Source: PubMed Central journal article supplement (PMC9575559)
Supplement: NIHMS1777120-supplement-1.pdf [file NIHMS1777120-supplement-1.pdf]

**Supplemental Table 1.** SSMHAS Item Level Factor Loadings

| Item                                                | Loading on Factor 1 | Uniqueness |
|-----------------------------------------------------|---------------------|------------|
| Have misunderstandings                              | 0.40                | 0.84       |
| Have a quick temper                                 | 0.53                | 0.72       |
| Get into fights or quarrels                         | 0.55                | 0.69       |
| Feel rude ( <i>takian</i> )                         | 0.55                | 0.70       |
| Have many thoughts                                  | 0.49                | 0.76       |
| Have sleepless nights                               | 0.51                | 0.74       |
| Feel unsettled                                      | 0.60                | 0.63       |
| Feel stressed up ( <i>nefsiat</i> )                 | 0.54                | 0.70       |
| Feel lonely                                         | 0.55                | 0.70       |
| Feel unwanted                                       | 0.60                | 0.64       |
| Feel useless                                        | 0.59                | 0.66       |
| Feel isolated or abandoned ( <i>hasud or abau</i> ) | 0.58                | 0.66       |
| Feel weak                                           | 0.48                | 0.77       |
| Feel sorrowful                                      | 0.53                | 0.72       |
| Feel like crying                                    | 0.60                | 0.64       |
| Feel pain in heart ( <i>waja gelba</i> )            | 0.56                | 0.69       |
| Are you easily startled                             | 0.61                | 0.63       |
| Think about bad things that happened in the past    | 0.53                | 0.72       |
| Do bad things in the past make you act crazy        | 0.62                | 0.62       |
| Feel traumatized ( <i>kafu</i> )                    | 0.61                | 0.62       |
| Fear that others are talking about you              | 0.56                | 0.69       |
| Feel shy                                            | 0.52                | 0.73       |
| Hide from others                                    | 0.50                | 0.75       |
| Feel shame ( <i>fadia</i> )                         | 0.43                | 0.82       |

**Supplemental Table 2.** Test-Retest and Interrater Reliability Intraclass Correlation (ICC) Scores

| <i>Item.</i> How often do you...                  | ICC agreement |               |                  |
|---------------------------------------------------|---------------|---------------|------------------|
|                                                   | Full sample   | Same rater    | Different raters |
| get into fights or quarrels?                      | 89.15%        | 84.31%        | 92.21%           |
| have misunderstandings?                           | 90.62%        | 86.00%        | 93.51%           |
| have a quick temper?                              | 76.74%        | 82.35%        | 74.03%           |
| feel rude (takian)?                               | 86.82%        | 90.20%        | 84.42%           |
| have many thoughts?                               | 72.87%        | 80.39%        | 68.83%           |
| how often do you have sleepless nights?           | 79.07%        | 86.27%        | 74.03%           |
| feel unsettled?                                   | 95.35%        | 96.08%        | 94.81%           |
| feel stressed up?                                 | 79.07%        | 80.39%        | 79.22%           |
| feel lonely?                                      | 93.80%        | 96.08%        | 93.51%           |
| feel unwanted?                                    | 96.12%        | 98.04%        | 94.81%           |
| feel useless?                                     | 96.12%        | 96.08%        | 96.10%           |
| feel isolated or abandoned (hasud or abau)        | 100.00%       | 100.00%       | 100.00%          |
| feel weak?                                        | 86.82%        | 90.20%        | 84.42%           |
| feel sorrowful?                                   | 93.02%        | 90.20%        | 94.81%           |
| feel like crying?                                 | 81.40%        | 78.43%        | 84.42%           |
| feel pain in heart (waja gelba)?                  | 72.09%        | 76.47%        | 68.83%           |
| are you easily startled?                          | 89.15%        | 88.24%        | 89.61%           |
| think about bad things that happened in the past? | 84.50%        | 94.12%        | 77.92%           |
| do bad things in the past make you act crazy?     | 98.45%        | 98.04%        | 98.70%           |
| feel traumatized (kafu)?                          | 88.37%        | 92.16%        | 87.01%           |
| fear that others are talking about you?           | 93.02%        | 94.12%        | 92.21%           |
| feel shy?                                         | 93.02%        | 96.08%        | 90.91%           |
| hide from others?                                 | 97.67%        | 98.04%        | 97.40%           |
| feel shame (fadia)?                               | 75.19%        | 88.24%        | 66.23%           |
| <b>Mean</b>                                       | <b>87.85%</b> | <b>90.02%</b> | <b>86.58%</b>    |
